# Supplementary material for: Surface engineering on mesoporous silica chips for enriching low molecular weight phosphorylated proteins
Source: Royal Society of Chemistry journal article supplement (doi:10.1039/c0nr00720j), 2010-12-07
Supplement: c0nr00720j.pdf [file c0nr00720j.pdf]

Supporting Information For

## Surface Engineering on Mesoporous Silica Chips for Enriching Low Molecular Weight Phosphorylated Proteins

Ye Hu<sup>1</sup>, Yang Peng<sup>1</sup>, Kevin Lin<sup>2</sup>, , Haifa Shen<sup>1</sup>, Louis Brousseau III<sup>1</sup>, Jason Sakamoto<sup>1</sup>, Tong Sun<sup>1</sup>, Mauro Ferrari<sup>1,2,3,4</sup>

1. Department of Nanomedicine and Biomedical Engineering, the University of Texas Health Science Center at Houston

2. Department of Biomedical Engineering, the University of Texas at Austin

3. The University of Texas M.D. Anderson Cancer Center

4. Department of Bioengineering, Rice University

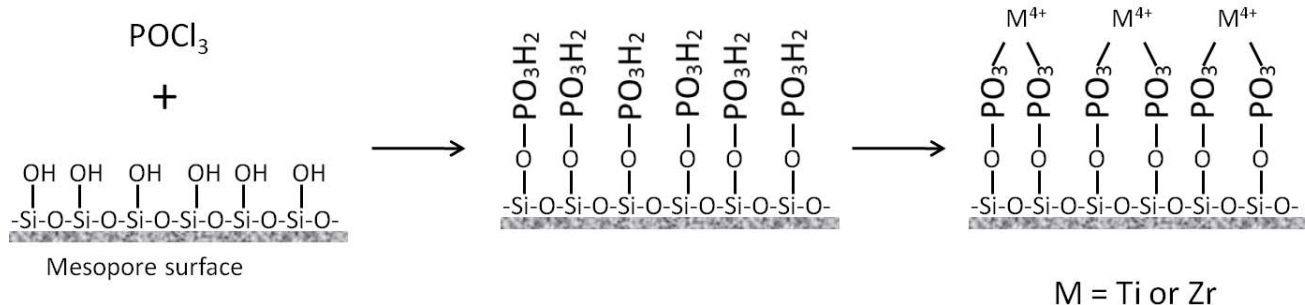

Figure S.1. Schematic representation of 2-step postsynthetic functionalization of mesoporous silica thin films with metal ion (Zr<sup>4+</sup> or Ti<sup>4+</sup>).

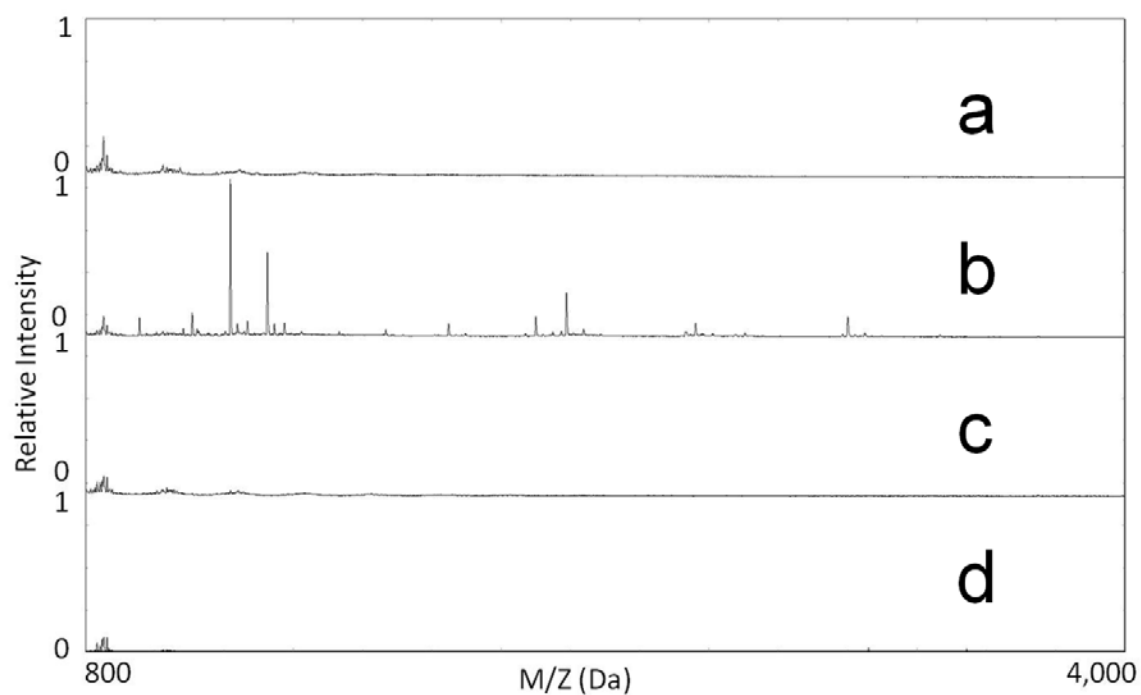

Figure S.2. MALDI TOF spectra of fractionated peptides processed by  $\text{Ti}^{4+}$  immobilized chip from (a) raw  $\alpha$ -casein, (b) trypsinized  $\alpha$ -casein, (c) trypsinized  $\alpha$ -casein treated with phosphatase, and (d) raw  $\alpha$ -casein treated with phosphatase.

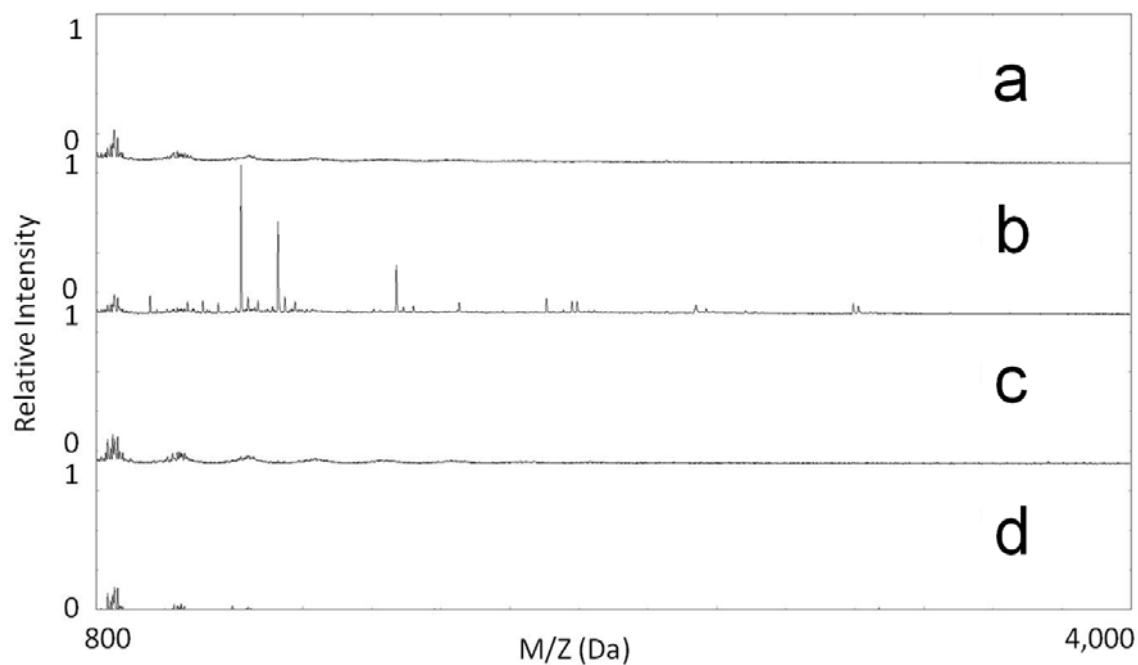

Figure S.3. MALDI TOF spectra of fractionated peptides processed by  $\text{Ga}^{3+}$  immobilized chip from (a) raw  $\alpha$ -casein, (b) trypsinized  $\alpha$ -casein, (c) trypsinized  $\alpha$ -casein treated with phosphatase, and (d) raw  $\alpha$ -casein treated with phosphatase.
